# Supplementary material
Source: PubMed Central journal article supplement (PMC6485364)
Supplement: jciinsight-4-124370-s112.pdf [file jciinsight-4-124370-s112.pdf]

## Supplementary Materials:

**Fig. S1.**

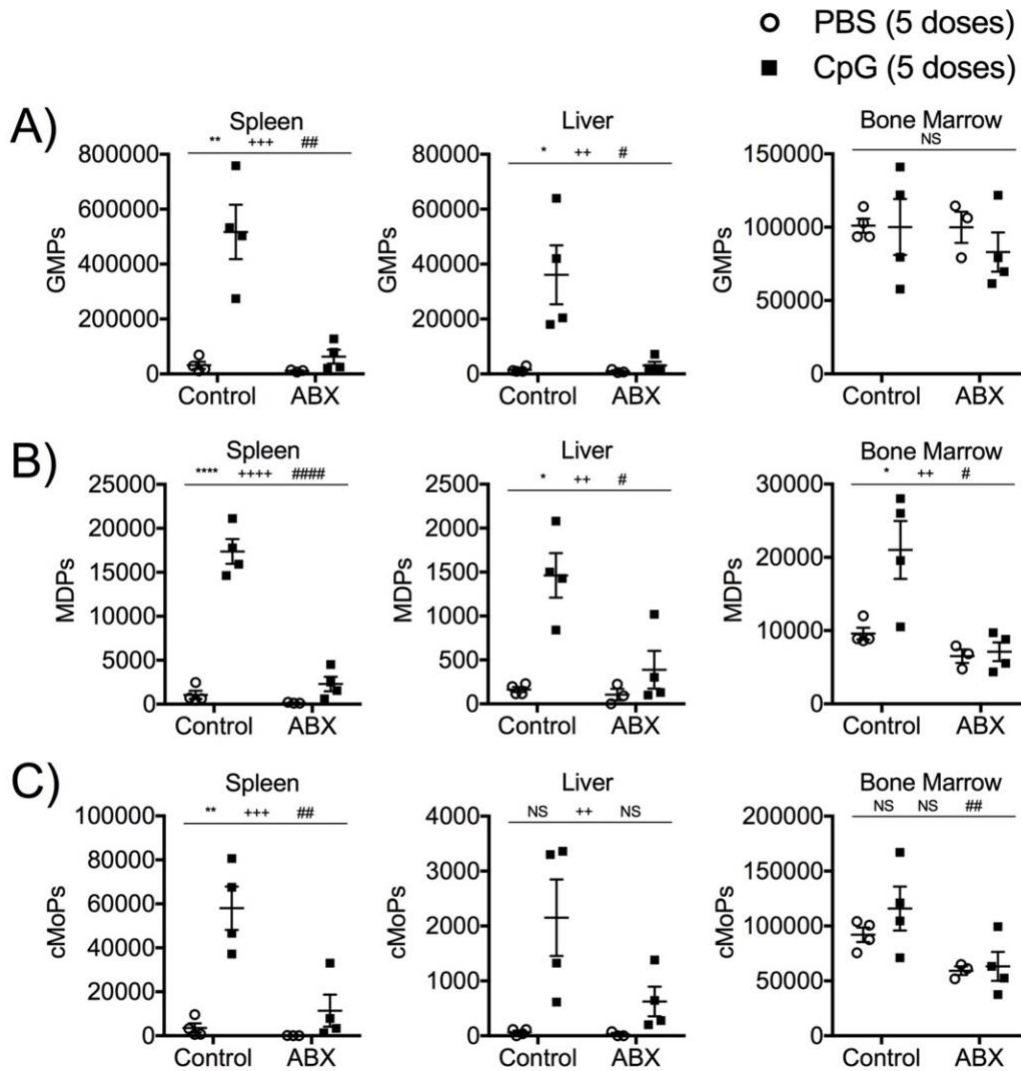

**Supplemental Figure S1. Related to Figure 1. Antibiotic-treated mice do not accumulate extramedullary myeloid progenitors downstream of repeated TLR9 activation *in vivo*.** C57BL/6 mice were pretreated with antibiotic (ABX) or control water *ad libitum* for 3 weeks and continued throughout the course of the experiment. Five doses of PBS or the TLR9 agonist CpG1826 (50  $\mu$ g/injection) were subsequently administered intraperitoneally to antibiotic-treated and control mice over the course of 10 days. Mice were sacrificed twenty-four hours after the fifth injection. Numbers of spleen (left), liver (middle), and bone marrow (right) myeloid progenitors were enumerated [A – granulocyte-monocyte progenitors (GMPs); B – Monocyte-Dendritic cell Progenitors (MDP); C – committed Monocyte Progenitor (cMoP)]. Each graph displays representative data from one of three independent experiments (N=4 mice per group). Individual symbols represent one mouse and the horizontal lines represent mean values. Analysis was performed by two-way ANOVA (P values are denoted as follows: \* Interaction term; + control vs. antibiotic-treated; # PBS vs. CpG *in vivo* treatments; NS = not significant).

Fig S2.

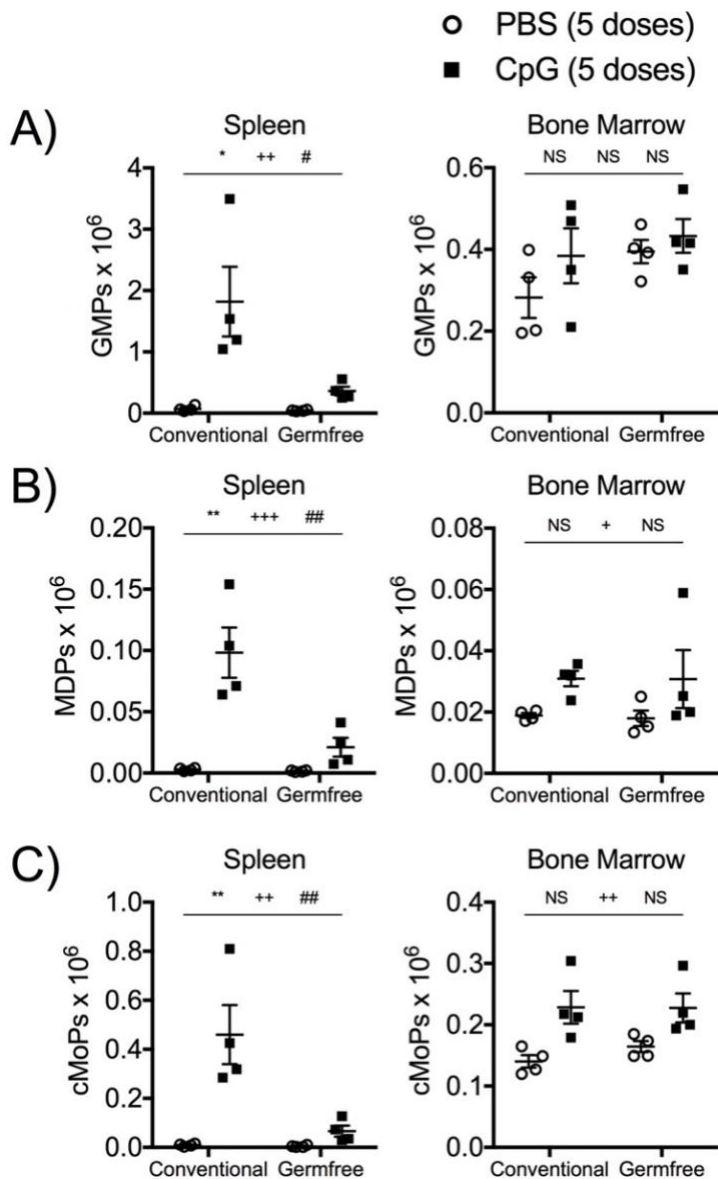

**Supplemental Figure S2. Related to Figure 2. Germ-free mice do not accumulate extramedullary myeloid progenitors downstream of repeated TLR9 activation *in vivo*.** Conventionally-housed and germ-free C57BL/6 mice were treated with five doses of PBS or CpG1826 over the course of 10 days. Mice were sacrificed twenty-four hours after the fifth injection. Numbers of spleen (left) and bone marrow (right) myeloid progenitors were enumerated [A - granulocyte-monocyte progenitors (GMPs); B – Monocyte-Dendritic cell Progenitors (MDP); C – committed Monocyte Progenitor (cMoP)]. Each graph displays representative data from one of two independent experiments (N=4 mice per group). Individual symbols represent one mouse and the horizontal lines represent mean values. Analysis was performed by two-way ANOVA (P values are denoted as follows: \* Interaction term; + conventionally-housed vs. germ-free; # PBS vs. CpG *in vivo* treatments; NS = not significant).

**Fig. S3**

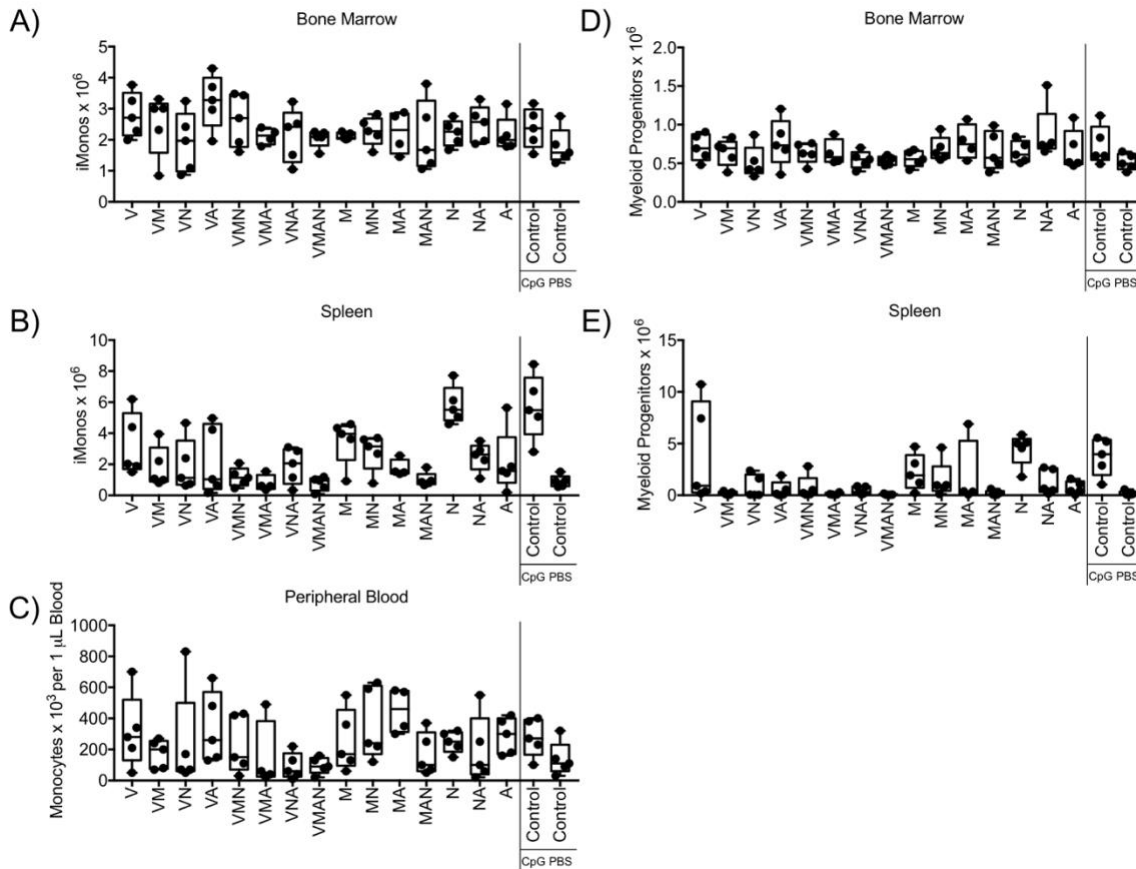

**Supplemental Figure S3. Related to Figures 5 and 6. Inflammation-induced accumulation of extramedullary medullary monocytes and myeloid progenitors vary by antibiotic treatment.** A factorial study design was conducted to treat cohorts of mice with every combination of the four antibiotic cocktail found to protect mice from murine MAS (V = Vancomycin, M = Metronidazole, N = Neomycin, A = Ampicillin). C57BL/6 mice were pretreated with each antibiotic combination for 3 weeks prior to treatment of mice with five doses the TLR9 agonist CpG1826 over the course of 10 days to induce murine MAS. Mice were sacrificed twenty-four hours after the fifth injection. Numbers inflammatory monocytes (iMonos) were enumerated from the bone marrow (A) and spleen (B). Peripheral blood monocytes were enumerated from analysis of whole blood from cheek bleeds (C). Numbers of total myeloid progenitors (CMPs + GMPs + MDPs + cMoPs) were enumerated from the bone marrow (D) and spleen (E).

**Fig. S4**

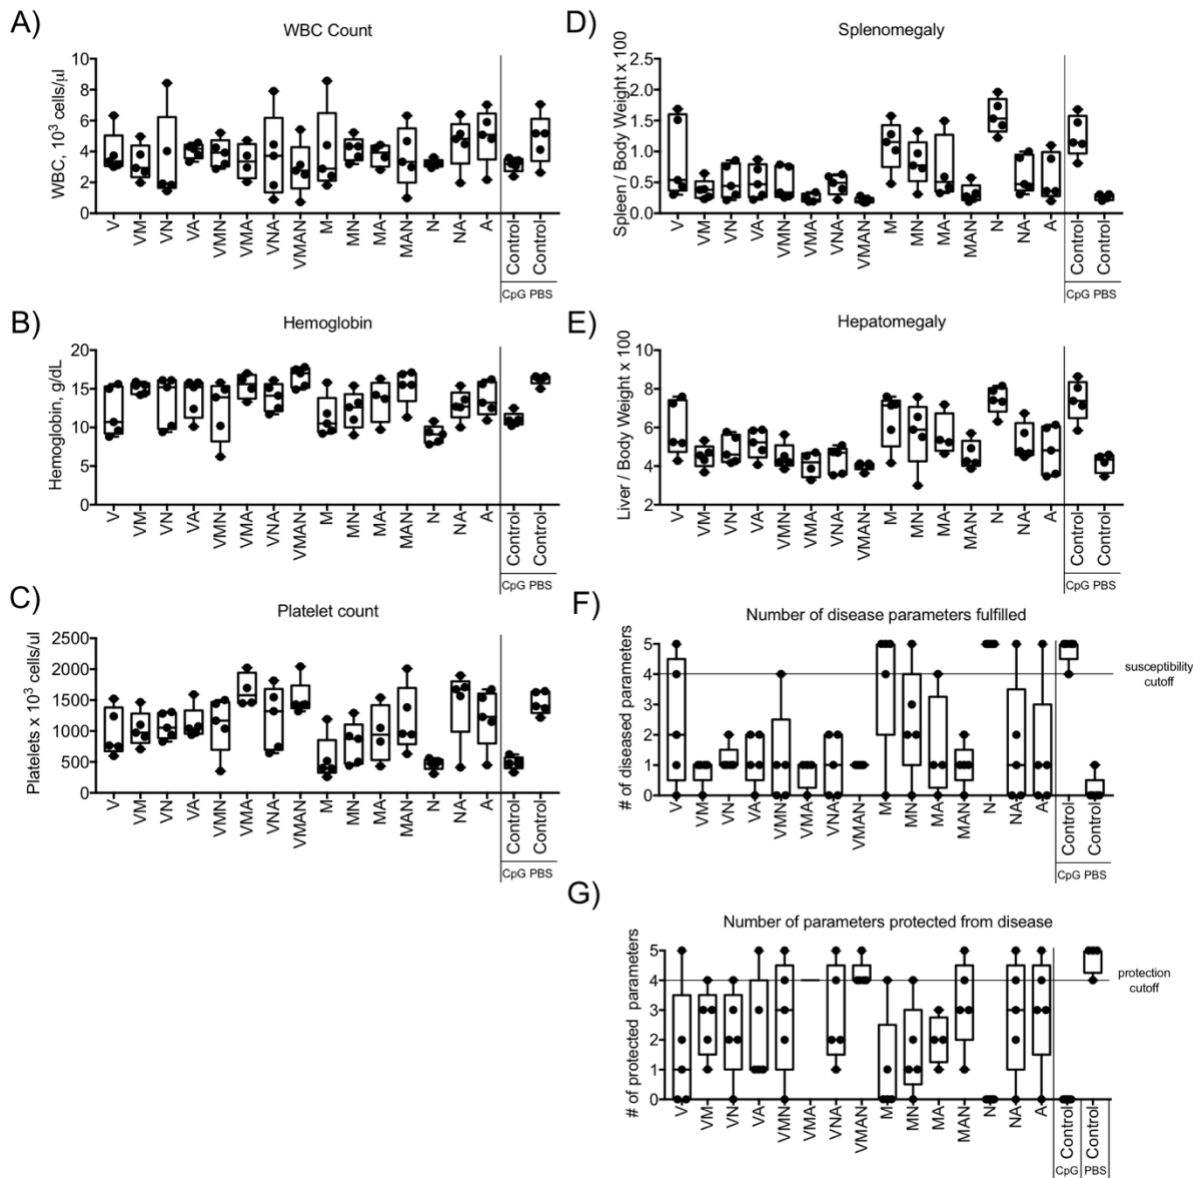

**Supplemental Figure S4. Related to Figures 5 and 6. TLR9-induced MAS disease parameters by antibiotic treatment.** A factorial study design was conducted to treat cohorts of mice with every combination of the four antibiotic cocktail found to protect mice from murine MAS (V = Vancomycin, M = Metronidazole, N = Neomycin, A = Ampicillin). C57BL/6 mice were pretreated with each antibiotic combination for 3 weeks prior to treatment of mice with five doses the TLR9 agonist CpG1826 over the course of 10 days to induce murine MAS. Mice were sacrificed twenty-four hours after the fifth injection, and markers of disease were measured including white blood cell (WBC) count (A), hemoglobin (B), platelet count (C), splenomegaly (D), and hepatomegaly (E). (F) Individual mice within each antibiotic treatment group were categorized based on MAS disease outcomes into mice that were susceptible to disease based on meeting 4/5 disease parameters (splenomegaly, hepatomegaly, anemia, leukopenia, and thrombocytopenia) within 20-30% of CpG-treated Control mice or worse. (G) Individual mice within each antibiotic treatment group were categorized based on MAS disease outcomes into mice that were protected from disease based on meeting 4/5 disease parameters (splenomegaly, hepatomegaly, anemia, leukopenia, and thrombocytopenia) within 20-30% of PBS-treated Control mice or better.

**Fig. S5.**

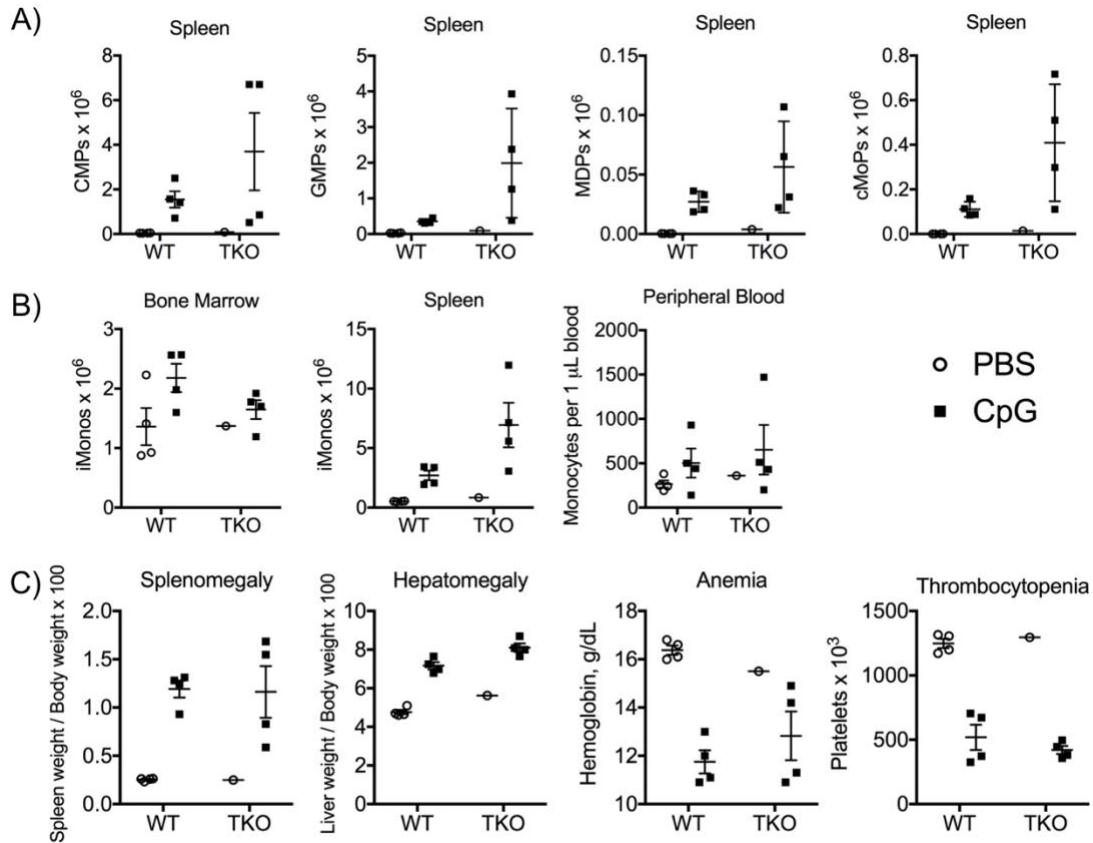

**Supplemental Figure S5. LPS-signaling via TLR4/Caspase is not required for TLR9-enhanced myelopoiesis or induction of murine MAS.** TLR4<sup>-/-</sup> mice were bred to Caspase-1/11<sup>-/-</sup> to make TLR4<sup>-/-</sup> Caspase-1/11<sup>-/-</sup> triple knockout mice that are unable to be activated by LPS at the cell surface (TLR4 activation) or upon encountering LPS within the cytoplasm of cells (Caspase-11 activation). C57BL/6 wild-type mice and triple knockout mice were treated with five doses the TLR9 agonist CpG1826 (closed symbols) or PBS (open symbols) over the course of 10 days to induce murine MAS. Mice were sacrificed twenty-four hours after the fifth injection, and markers of disease were measured. (A) Myeloid progenitors were enumerated from the spleens of sacrificed mice (CMPs = Common Myeloid Progenitors, GMPs = Granulocyte-Monocyte Progenitors, MDPs = Monocyte-Dendritic cell Progenitors, cMoPs = committed Monocyte Progenitors). (B) Bone marrow and spleen inflammatory monocytes (iMonos) and total peripheral blood monocytes were enumerated. (C) Markers of murine MAS disease were measured including splenomegaly, hepatomegaly, anemia, and thrombocytopenia.

**Fig. S6.**

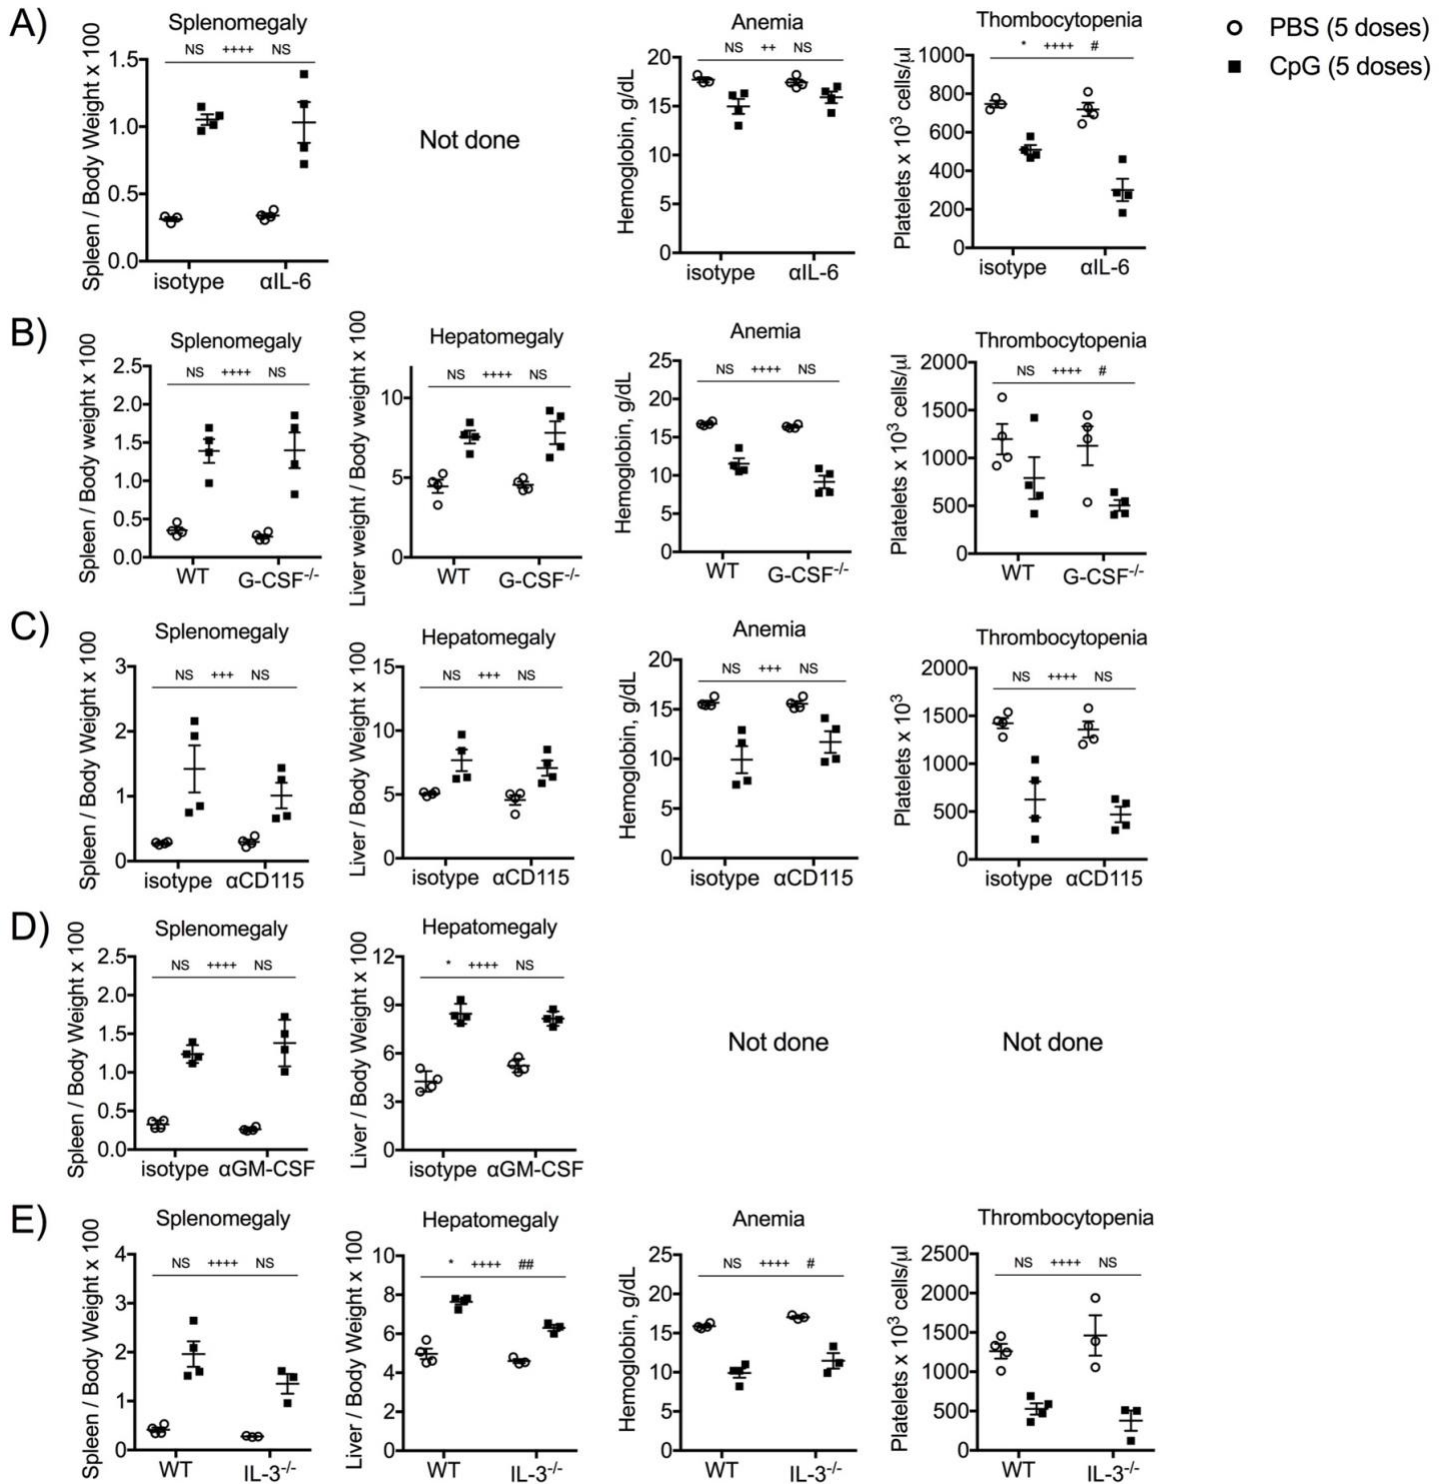

**Supplemental Figure S6. Related to Figure 8. Inhibition of individual myeloid-specifying cytokines does not prevent TLR9-mediated cytokine storm immunopathology. (A)** WT C57BL/6 and G-CSF<sup>-/-</sup> mice were treated with five doses of PBS or CpG1826, and immunopathology downstream of TLR9-mediated cytokine was measured twenty-four hours after the last injection. **(B)** WT C57BL/6 mice were treated with anti-CD115 (the M-CSF receptor) or isotype control antibodies in combination with five doses of PBS or CpG1826 over the course of ten days, and immunopathology downstream of TLR9-mediated cytokine was measured twenty-four hours after the last injection. **(C)** WT C57BL/6 mice were treated with anti-GM-CSF or isotype control

antibodies in combination with five doses of PBS or CpG1826 injections over the course of ten days, and immunopathology downstream of TLR9-mediated cytokine was measured twenty-four hours after the last injection. **(D)** WT C57BL/10J and IL-3<sup>-/-</sup> mice were treated with five doses of PBS or CpG1826, and immunopathology downstream of TLR9-mediated cytokine was measured twenty-four hours after the last injection. **(E)** WT C57BL/6 mice were treated with anti-IL-6 or isotype control antibodies in combination with five doses of PBS or CpG1826 injections over the course of ten days, and immunopathology downstream of TLR9-mediated cytokine was measured twenty-four hours after the last injection. Individual symbols represent one mouse and the horizontal lines represent mean values. Analysis was performed by two-way ANOVA (P values are denoted as follows: \* Interaction term; + control vs. antibiotic-treated; # PBS vs. CpG *in vivo* treatments; NS = not significant).

**Fig. S7.**

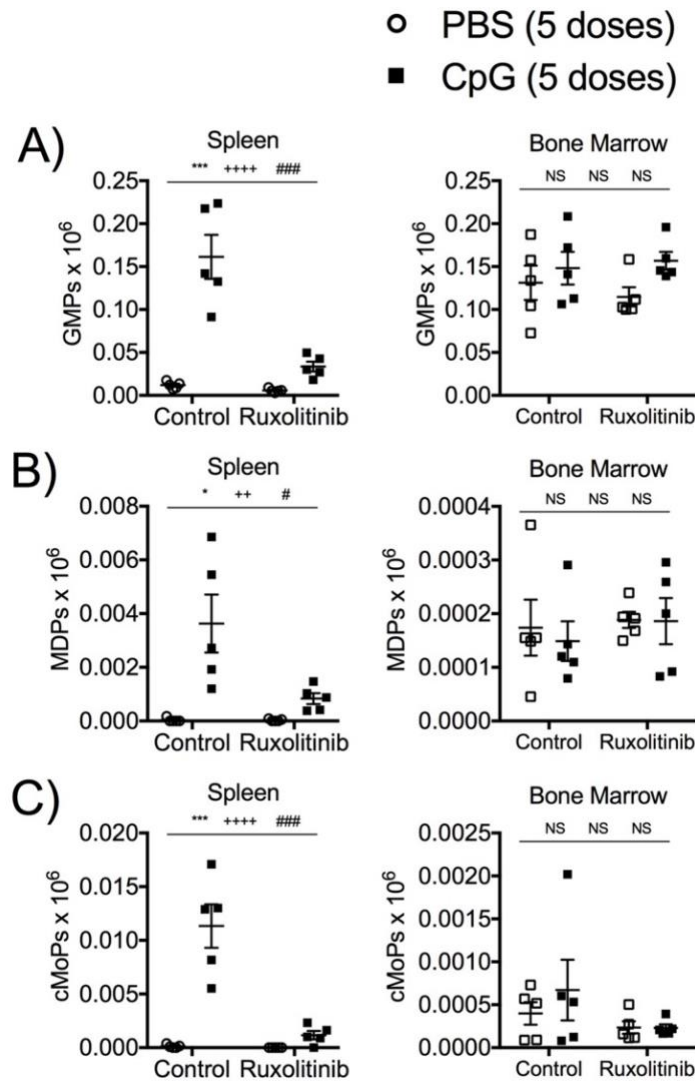

**Supplemental Figure S7. Related to Figure 9. Ruxolitinib-treated mice do not accumulate extramedullary myeloid progenitors downstream of repeated TLR9 activation *in vivo*.** C57BL/6 mice were treated with five doses of PBS or CpG1826 over the course of 10 days. Mice received control chow or chow containing the JAK1/2 inhibitor ruxolitinib starting after the second injection, and were sacrificed twenty-four hours after the fifth injection. Numbers of spleen (left) and bone marrow (right) myeloid progenitors were enumerated [**A** - granulocyte-monocyte progenitors (GMPs); **B** - Monocyte-Dendritic cell Progenitors (MDP); **C** - committed Monocyte Progenitor (cMoP)]. Each graph displays representative data from one of two independent experiments (N=5 mice per group). Individual symbols represent one mouse and the horizontal lines represent mean values. Analysis was performed by two-way ANOVA (P values are denoted as follows: \* Interaction term; + control vs. ruxolitinib-treated; # PBS vs. CpG *in vivo* treatments; NS = not significant).

**Table S1. Related to Figure 7. Results of GSEA using gene sets relevant to myelopoiesis and innate immunity.** (NES = Normalized Enrichment Score; FDR = false discovery rate)

| Gene Set                                            | NES   | FDR   |
|-----------------------------------------------------|-------|-------|
| IFN $\alpha$ / $\beta$ signaling                    | -1.92 | 0.003 |
| IFN $\gamma$ signaling                              | -1.67 | 0.028 |
| cytokine signaling in immune system                 | -1.5  | 0.088 |
| Negative regulators of RIG-I/MDA5 signaling         | -1.41 | 0.129 |
| Activated TLR4 signaling                            | -1.35 | 0.155 |
| IL-3, 4, and GM-CSF signaling                       | -1.01 | 0.802 |
| IL-1 signaling                                      | -0.97 | 0.815 |
| NOTCH1 intracellular domain regulates transcription | -0.92 | 0.833 |
| IL-2 signaling                                      | -0.88 | 0.846 |
| Signaling by Notch                                  | -0.84 | 0.84  |
| PI3K AKT activation                                 | -0.66 | 0.961 |
| Inflammasomes                                       | 1.3   | 0.101 |

**Table S2. Related to Figure 7. Differentially expressed genes between myeloid progenitors from antibiotic-treated mice and control mice.** (FDR = false discovery rate)

| Entrez Gene Name                                 | Gene Symbol | FDR   |
|--------------------------------------------------|-------------|-------|
| small nucleolar RNA, C/D box 13                  | Snord13     | 0.042 |
| interferon induced protein 44                    | IFI44       | 0.057 |
| olfactory receptor 695                           | Olfir695    | 0.059 |
| peptidylprolyl isomerase C                       | PPIC        | 0.059 |
| C-type lectin domain family 4 member A           | CLEC4A      | 0.063 |
| family with sequence similarity 159 member A     | FAM159A     | 0.063 |
| carbonic anhydrase 1                             | CA1         | 0.076 |
| nucleoporin 210                                  | NUP210      | 0.087 |
| BCL2 interacting protein 3 like                  | BNIP3L      | 0.094 |
| monoamine oxidase A                              | MAOA        | 0.094 |
| RNA binding motif protein 3                      | RBM3        | 0.105 |
| growth differentiation factor 3                  | GDF3        | 0.109 |
| predicted gene 12977                             | Gm12977     | 0.109 |
| aminopeptidase puromycin sensitive               | NPEPPS      | 0.109 |
| chromosome 7 open reading frame 50               | C7orf50     | 0.111 |
| echinoderm microtubule associated protein like 5 | EML5        | 0.111 |
| hexosaminidase subunit alpha                     | HEXA        | 0.111 |
| La ribonucleoprotein domain family member 1      | LARP1       | 0.111 |
| pre-mRNA processing factor 8                     | PRPF8       | 0.111 |
| ring finger protein 11                           | RNF11       | 0.111 |
| carbonyl reductase 1                             | CBR1        | 0.115 |
| chitinase-like 3                                 | Chil3/Chil4 | 0.115 |

|                                                       |                         |       |
|-------------------------------------------------------|-------------------------|-------|
| C-type lectin domain family 4, member b2              | Clec4b2                 | 0.115 |
| carboxypeptidase A3                                   | CPA3                    | 0.115 |
| family with sequence similarity 13 member B           | FAM13B                  | 0.115 |
| isocitrate dehydrogenase (NADP(+)) 2, mitochondrial   | IDH2                    | 0.115 |
| interferon induced transmembrane protein 3            | IFITM3                  | 0.115 |
| immunoglobulin kappa chain variable 8-27              | Igkv8-27                | 0.115 |
| ketoheokinase                                         | KHK                     | 0.115 |
| kelch like family member 24                           | KLHL24                  | 0.115 |
| multiple inositol-polyphosphate phosphatase 1         | MINPP1                  | 0.115 |
| 2'-5'-oligoadenylate synthetase 3                     | OAS3                    | 0.115 |
| poly(ADP-ribose) polymerase family member 14          | PARP14                  | 0.115 |
| pleckstrin homology like domain family B member 3     | PHLDB3                  | 0.115 |
| prostaglandin E synthase 3                            | PTGES3                  | 0.115 |
| transforming growth factor beta 1                     | TGFB1                   | 0.115 |
| TIA1 cytotoxic granule associated RNA binding protein | TIA1                    | 0.115 |
| transmembrane protein 97                              | TMEM97                  | 0.115 |
| vascular endothelial zinc finger 1                    | VEZF1                   | 0.115 |
| zinc finger and BTB domain containing 16              | ZBTB16                  | 0.115 |
| family with sequence similarity 173 member A          | FAM173A                 | 0.117 |
| NHP2 ribonucleoprotein                                | NHP2                    | 0.117 |
| scinderin                                             | SCIN                    | 0.117 |
| cell death-inducing DFFA-like effector a              | CIDEA                   | 0.118 |
| formin like 2                                         | FMNL2                   | 0.118 |
| mucin 13, cell surface associated                     | MUC13                   | 0.118 |
| dehydrogenase/reductase 3                             | DHRS3                   | 0.127 |
| fructose-bisphosphatase 1                             | FBP1                    | 0.133 |
| RIKEN cDNA A930041C12 gene                            | A930041C12Rik           | 0.134 |
| adaptor related protein complex 2 mu 1 subunit        | AP2M1                   | 0.134 |
| FXRD domain-containing ion transport regulator 2      | Fxyd2                   | 0.134 |
| predicted gene 428                                    | Gm428 (includes others) | 0.134 |
| LIM zinc finger domain containing 1                   | LIMS1                   | 0.134 |
| matrilin 1, cartilage matrix protein                  | MATN1                   | 0.134 |
| chromosome 12 open reading frame 57                   | C12orf57                | 0.138 |
| heterogeneous nuclear ribonucleoprotein A1            | Hnrnpa1                 | 0.138 |
| protein disulfide isomerase family A member 6         | PDIA6                   | 0.138 |
| argininosuccinate synthase 1                          | ASS1                    | 0.145 |
| cartilage associated protein                          | CRTAP                   | 0.145 |
| small nucleolar RNA, C/D box 104                      | Snord104                | 0.145 |
| RIKEN cDNA 5730408K05 gene                            | 5730408K05Rik           | 0.148 |
| SET and MYND domain containing 4                      | SMYD4                   | 0.148 |
| proteasome subunit beta 7                             | PSMB7                   | 0.149 |

|                                                         |          |       |
|---------------------------------------------------------|----------|-------|
| B-cell CLL/lymphoma 11A                                 | BCL11A   | 0.154 |
| ALG8, alpha-1,3-glucosyltransferase                     | ALG8     | 0.162 |
| TATA-box binding protein associated factor 15           | TAF15    | 0.162 |
| charged multivesicular body protein 6                   | CHMP6    | 0.167 |
| leucine rich repeat containing 59                       | LRRC59   | 0.167 |
| single-pass membrane protein with coiled-coil domains 4 | Smco4    | 0.168 |
| calreticulin                                            | CALR     | 0.171 |
| glutathione S-transferase mu 3                          | GSTM3    | 0.171 |
| host cell factor C1                                     | HCFC1    | 0.171 |
| MARVEL domain containing 2                              | MARVELD2 | 0.171 |
| minichromosome maintenance complex component 4          | MCM4     | 0.171 |
| SUB1 homolog, transcriptional regulator                 | SUB1     | 0.171 |
| transmembrane BAX inhibitor motif containing 6          | TMBIM6   | 0.171 |
| heat shock protein family D (Hsp60) member 1            | HSPD1    | 0.173 |
| predicted gene, 36856                                   | Gm36856  | 0.178 |
| predicted gene, 16758                                   | Gm16758  | 0.181 |
| 3-oxoacid CoA-transferase 1                             | OXCT1    | 0.181 |
| hypoxia up-regulated 1                                  | HYOU1    | 0.184 |
| MARVEL domain containing 1                              | MARVELD1 | 0.193 |
| nuclear transport factor 2 like export factor 1         | NXT1     | 0.193 |
| ATP binding cassette subfamily E member 1               | ABCE1    | 0.196 |
| basal cell adhesion molecule (Lutheran blood group)     | BCAM     | 0.196 |
| predicted gene 12247                                    | Gm12247  | 0.196 |
| microRNA 421                                            | mir-95   | 0.196 |
| naked cuticle homolog 2                                 | NKD2     | 0.196 |
| olfactory receptor 472                                  | Olfr472  | 0.196 |
| protocadherin beta 1                                    | PCDHB1   | 0.196 |
| peptidase, mitochondrial processing alpha subunit       | PMPCA    | 0.196 |

**Table S3. Key Resources Table.**

| REAGENT OR RESOURCE                                      | SOURCE                      | IDENTIFIER    |
|----------------------------------------------------------|-----------------------------|---------------|
| <u><i>Mus musculus</i> Strains</u>                       |                             |               |
| Wild-type C57BL/6                                        | The Jackson Laboratory      | 000664        |
| G-CSF <sup>-/-</sup>                                     | The Jackson Laboratory      | 002398        |
| Wild-type C57BL/10J                                      | The Jackson Laboratory      | 000665        |
| IL-3 <sup>-/-</sup>                                      | The Jackson Laboratory      | 023816        |
| TLR4 <sup>-/-</sup>                                      | The Jackson Laboratory      | 007227        |
| Caspase-1/11 <sup>-/-</sup>                              | The Jackson Laboratory      | 016621        |
| <u>Chemicals, Peptides, and Recombinant Proteins</u>     |                             |               |
| ACK lysis buffer                                         | Lonza                       | 10-548E       |
| LIVE/DEAD™ Fixable Aqua Dead Cell Stain Kit              | ThermoFisher Scientific     | L34957        |
| Sucrose                                                  | Avantor                     | 4097-06       |
| Percoll                                                  | Sigma                       | GE17-0891-01  |
| Brefeldin A                                              | Sigma                       | B7651         |
| Ampicillin                                               | Sigma                       | A9518         |
| Metronidazole                                            | Sigma                       | M3761         |
| Neomycin                                                 | Sigma                       | N1876         |
| Vancomycin                                               | Sigma                       | V2002         |
| DNase I                                                  | Sigma                       | 10104159001   |
| Collagenase A                                            | Sigma                       | 10103586001   |
| Anti-mouse CD16/32 (Fc block), clone 2.4G2               | Bio X cell                  | BE0307        |
| Anti-mouse CSF1R (CD115), clone AFS98                    | Bio X cell                  | BE0213        |
| Anti-mouse GM-CSF, clone MP1-22E9                        | Bio X cell                  | BE0259        |
| Anti-mouse IL-6, clone MP5-20F3                          | Bio X cell                  | BE0046        |
| Anti-mouse IFNAR-1, clone MAR1-5A3                       | Bio X cell                  | BE0241        |
| Control antibody for anti-IFNAR-1 experiment, MOPC-21    | Bio X cell                  | BE0083        |
| Control antibody for anti-M-CSF experiment, clone LFT-2  | Bio X cell                  | BE0090        |
| Control antibody for anti-GM-CSF experiment, clone LFT-2 | Bio X cell                  | BE0090        |
| Control antibody for anti-IL-6 experiment, clone SFR8-B6 | ATCC                        | ATCC® HB-152™ |
| Recombinant murine IL-3                                  | Peprotech                   | 213-13        |
| Recombinant murine M-CSF                                 | Peprotech                   | 315-02        |
| Recombinant murine GM-CSF                                | Peprotech                   | 315-03        |
| Recombinant murine SCF                                   | Peprotech                   | 250-03        |
| Control chow                                             | Incyte Corporation          | MTA required  |
| Ruxolitinib chow                                         | Incyte Corporation          | MTA required  |
| <u>Oligonucleotides</u>                                  |                             |               |
| CpG1826 (special order with a phosphothioate backbone)   | Integrated DNA Technologies |               |
| Sequence: T*C*C*A*T*G*A*C*G*T*T*C*C*T*G*A*C*G*T*T        |                             |               |
| <u>Flow Cytometry Antibodies</u>                         |                             |               |
| PE anti-mouse B220 Antibody (clone RA3-6B2)              | Biolegend                   | 103207        |
| PE anti-mouse CD4 Antibody (clone RM4-5)                 | BD Biosciences              | 553049        |
| PE anti-mouse CD8 Antibody (clone 53-6.7)                | Biolegend                   | 100708        |
| APC/Cy7 anti-mouse CD11b Antibody (clone M170)           | BD Biosciences              | 557657        |
| PE anti-mouse CD11b Antibody (clone M170)                | eBiosciences                | 12-0112-82    |
| PE anti-mouse CD11c Antibody (clone HL3)                 | BD Biosciences              | 557401        |
| APC/Cy7 anti-mouse CD16/32 Antibody (clone 93)           | Biolegend                   | 101328        |
| PE anti-mouse CD49b Antibody (clone DX5)                 | Biolegend                   | 108908        |
| PE anti-mouse CD90.2 Antibody (clone 53-2.1)             | BD Biosciences              | 553006        |
| PerCP/Cy5.5 anti-mouse CD105 Antibody (clone MJ7/18)     | Biolegend                   | 120416        |

|                                                      |                |              |
|------------------------------------------------------|----------------|--------------|
| APC anti-mouse CD115 Antibody (clone AFS98)          | eBiosciences   | 17-1152-82   |
| PE/Cy7 anti-mouse CD115 Antibody (clone AFS98)       | eBiosciences   | 25-1152-82   |
| APC anti-mouse Ccr2 Antibody (clone 475301)          | R&D Systems    | FAB5538A-100 |
| PE anti-mouse Ccr2 Antibody (clone 475301)           | R&D Systems    | FAB5538P-100 |
| APC anti-mouse c-Kit/CD117 Antibody (clone 2B8)      | BD Biosciences | 553356       |
| PE anti-mouse GR-1 Antibody (clone RB6-8C5)          | Biolegend      | 108408       |
| PE anti-mouse IL-12 (p40/p70) Antibody (clone C15.6) | BD Biosciences | 554479       |
| PacBlue anti-mouse Ly6C Antibody (clone HK1.4)       | Biolegend      | 128014       |
| FITC anti-mouse Ly6G Antibody (clone 1A8)            | BD Biosciences | 561105       |
| PE anti-mouse Ly6G Antibody (clone 1A8)              | BD Biosciences | 551461       |
| PE anti-mouse NK1.1 Antibody (clone PK136)           | Biolegend      | 108708       |
| PE-Cy7 anti-mouse pSTAT1 (clone A15158B)             | Biolegend      | 686408       |
| PE anti-mouse Sca-1 Antibody (clone D7)              | Biolegend      | 108108       |
| PE anti-mouse Ter119 Antibody (clone TER-119)        | Biolegend      | 116208       |

#### Commercially available kits

|                                      |                         |        |
|--------------------------------------|-------------------------|--------|
| Cytofix/Cytoperm™                    | BD Biosciences          | 554714 |
| OptEIA™ TMB Substrate Reagent Set    | BD Biosciences          | 555214 |
| OptEIA™ Mouse IL-3 ELISA Set         | BD Biosciences          | 555228 |
| OptEIA™ Mouse IL-6 ELISA Set         | BD Biosciences          | 555240 |
| OptEIA™ Mouse IL-12 ELISA Set        | BD Biosciences          | 555256 |
| OptEIA™ Mouse IFN $\gamma$ ELISA Set | BD Biosciences          | 551866 |
| OptEIA™ Mouse GM-CSF ELISA Set       | BD Biosciences          | 555167 |
| Mouse M-CSF Quantikine ELISA Kit     | R&D Systems             | MMC00  |
| Mouse G-CSF Quantikine ELISA Kit     | R&D Systems             | MCS00  |
| RNeasy Plus Micro Kit                | Qiagen                  | 74034  |
| GeneChip™ Mouse Gene 2.0 ST Array    | ThermoFisher Scientific | 902119 |

#### Software

|                              |                 |                                                                                                                   |
|------------------------------|-----------------|-------------------------------------------------------------------------------------------------------------------|
| Prism v. 7.0a                | GraphPad        | <a href="http://www.graphpad.com">http://www.graphpad.com</a>                                                     |
| FlowJo v10.2                 | FlowJo          | <a href="http://www.flowjo.com">http://www.flowjo.com</a>                                                         |
| SPOT 5.1 Basic Software      | SPOT Imaging    | <a href="http://www.spotimaging.com/software/">http://www.spotimaging.com/software/</a>                           |
| Partek Genomics Suite        | Partek          | <a href="http://www.partek.com/pgs">http://www.partek.com/pgs</a>                                                 |
| Gene Set Enrichment Analysis | Broad Institute | <a href="http://software.broadinstitute.org/gsea/index.jsp">http://software.broadinstitute.org/gsea/index.jsp</a> |
| R version 3.2.3              | R Project       | <a href="https://cran.r-project.org/">https://cran.r-project.org/</a>                                             |

Ingenuity Pathway Analysis      Qiagen Bioinformatics  
<https://www.qiagenbioinformatics.com/products/ingenuity-pathway-analysis/>

Transcriptome Analysis Console      ThermoFisher Scientific  
<http://www.thermofisher.com/us/en/home/life-science/microarray-analysis/microarray-analysis-instruments-software-services/microarray-analysis-software/affymetrix-transcriptome-analysis-console-software.html>

Gene Pattern      Broad Institute  
<http://software.broadinstitute.org/cancer/software/genepattern/>
